# Supplementary material
Source: PubMed Central journal article supplement (PMC3496763)
Supplement: NIHMS414776-supplement-Supporting_Information.pdf [file NIHMS414776-supplement-Supporting_Information.pdf]

# CHEMPHYSICHEM

## Supporting Information

© Copyright Wiley-VCH Verlag GmbH & Co. KGaA, 69451 Weinheim, 2012

### **Two-Photon Absorption and Time-Resolved Stimulated Emission Depletion Spectroscopy of a New Fluorenyl Derivative**

Kevin D. Belfield,<sup>\*[a, b]</sup> Mykhailo V. Bondar,<sup>[c]</sup> Alma R. Morales,<sup>[a]</sup> Xiling Yue,<sup>[a]</sup>  
Gheorghe Luchita,<sup>[a]</sup> Olga V. Przhonska,<sup>[c]</sup> and Olexy D. Kachkovsky<sup>[d]</sup>

cphc\_201200405\_sm\_miscellaneous\_information.pdf

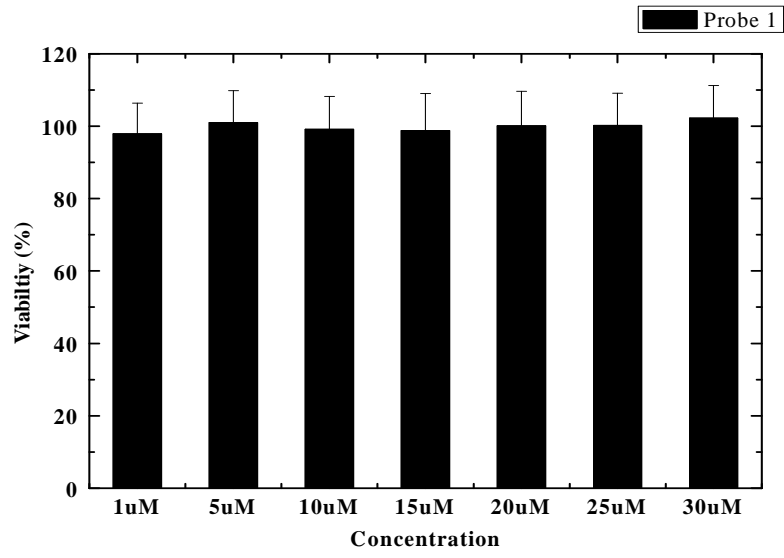

**Figure S1.** Cell viability assays of HCT 116 cells incubate with Pluronic® F-127-encapsulated 2PA probe 1.
